# Supplementary material
Source: publisher figshare collection journal article supplement (https://rs.figshare.com/ndownloader/files/18996053)
Supplement: Supplementary file 1 [file 18996053]

## Supporting Information

### Evolutionary patterns of vane barb angles in birds

Xia Wang, Ho Kwan Tang and Julia A. Clarke

#### Included:

1. Dataset and methods
2. Aves with different flight styles plotted in a wing phylomorphospace described by leading and trailing vane barb angles (Figure S1).
3. Aves with different flight styles plotted in a wing phylomorphospace described by trailing vane barb and barb angle asymmetry values. (Figure S2)
4. Changes in trailing vane barb angle variance from different feathers and positions across modern flight species. (Figure S3)
5. Changes in vane barb angle asymmetry variance from different feathers and positions across modern flight species. (Figure S4)
6. Changes in Leading vane barb angle variance from different feathers and positions across modern flight species (Figure S5)
7. Ancestral state reconstruction for leading (a), trailing (b) vane barb angles and barb angle asymmetry (c) showing the general evolutionary pattern for simplified phylogeny.
8. Measurements used for extant birds from Feo et al. (2015) (Table S1)
9. Measurements used for Mesozoic fossil taxa (Table S2)
10. Fossil age, divergence times data for paleotree (Table S3)
11. Images show the angle measurements of Mesozoic fossil taxa.

#### Dataset

Values for trailing vane angle and barb angle asymmetry for 25% feather length are significantly different for the Feo et al. sample. We chose to use the 50% values in this reanalysis since these were most similar to the measurement locations available for the majority fossil feathers sampled and because Feo et al. only provided 50% measurements for non-volant extant taxa. For Mesozoic taxa Measured values were compared to published values for specimens V15336, V13156, DNHM-D3078, BMNH-Ph000881 and Berlin specimen of *Archaeopteryx* utilized in that analysis.

#### Methods

##### (a) Phylogenetic signal and ancestral state reconstruction

Pagel's lambda [1] and Blomberg's K [2] were performed in R v. 3.0.1 [3] using the Phytools package (function `phylosig` [4]) to assess phylogenetic signal of barb angles. The influence of the phylogeny increases with lambda from 0 (no phylogenetic signal) and 1 (strong phylogenetic signal). When lambda = 0, a star phylogeny results with all tips radiating from a basal node, describing a model where traits evolve independent of the phylogeny. When lambda = 1, trait evolution followed a Brownian motion model, where branch lengths would be proportional to divergence. Blomberg's K statistic is used to test whether the observed distribution of traits exhibits more or less divergence than expected for traits evolving under Brownian motion. Values of K close to 1 indicate trait similarity is proportional to divergence and a Brownian motion model of evolution fits the data.  $K > 1$  indicates that close relatives are more similar than expected, and  $K < 1$  indicates more divergence between taxa than expected under a Brownian model.

Mesquite (v. 2.75 [5]) was used to map barb angles onto the reference phylogeny. Each character was traced onto the tree using the 'reconstruct ancestral state' module of Mesquite with weighted squared change parsimony [6]. Given the tree and observed character distribution, this method finds the ancestral states that minimize the number of steps of

character change.

1000 time-calibrated trees for the possible phylogenetic affinities of these 73 birds were sampled from the posterior distribution of Jetz et al [7] (<http://www.birdtree.org>). These trees use the Hackett et al [8] topology as a backbone. A majority rules consensus tree was built by Mesquite [5]. As taxa within passerines and rails are not fully resolved, the consensus tree was further resolved following recent phylogenetic hypotheses for passerines and rails [9, 10]. For Mesozoic taxa, we generate a fossil subtree with the timePaleoPhy function in paleotree [11] based on published fossil ages and branch [12, 13] (summarized in table S3). We grafted this time-calibrated tree of extinct taxa to the Aves tree with the bind.tip function in Phytools.

#### (b) Statistical analysis

All statistical analyses were conducted using the R statistical computing environment v.3.4.3 (R Development Core Team, 2017). To account for phylogeny via PGLS. ANOVA on PGLS models were conducted in R using the procD.pgls function in Geomorph package (residual randomisation permutation procedure) [14] and pairwise comparison was made in RRPP package [15]. The procD.pgls function performs ANOVA and regression models in a phylogenetic context under a Brownian motion model of evolution. The approach is derived from the statistical equivalency between parametric methods utilizing covariance matrices and methods based on distance matrices [14]. The randomization of residuals in a permutation procedure was used with 1000 iterations. F statistics are calculated from sums of squares based on coefficients that have appropriately accounted for phylogenetic relatedness. Effect-sizes (Z scores) are computed as standard deviates of the F sampling distributions generated [14].

The function Phylogenetic generalized least-squares (pGLS) were also performed in R package Caper [16] to assess the relationship between trailing vane barb angle and barb angle asymmetry. We categorized flight styles for living birds as those defined by Bruderer et al [17]. Specifically, “continuous flapping”, “flapping and soaring”, “flapping and gliding” and “passerine type flight”. Flightless species and fossils were categorized as distinct flight styles in this study. Measurements were log transformed to obtain a normal distribution as methods used have the assumption of normally distributed data.

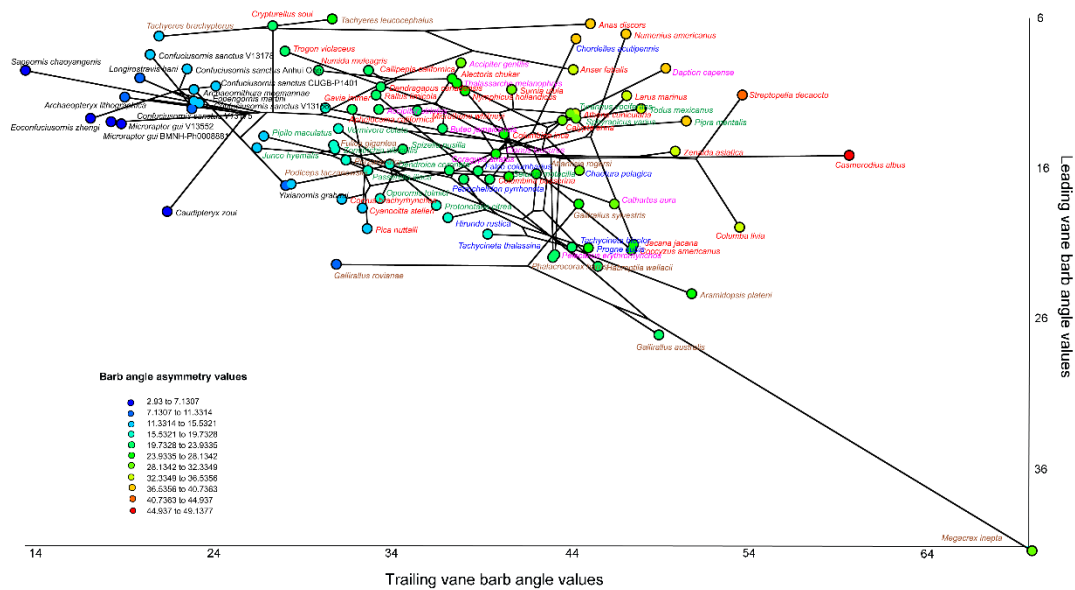

Figure S1. Aves with different flight styles and Mesozoic taxa plotted in a wing phylomorphospace described by leading and trailing vane barb angles. Red, continuous flapping “CF”; blue, flapping and soaring “FS”; purple, flapping and gliding “FG”; green, passerine type flight “PT”; brown, flightless “FL”; black, fossil data.

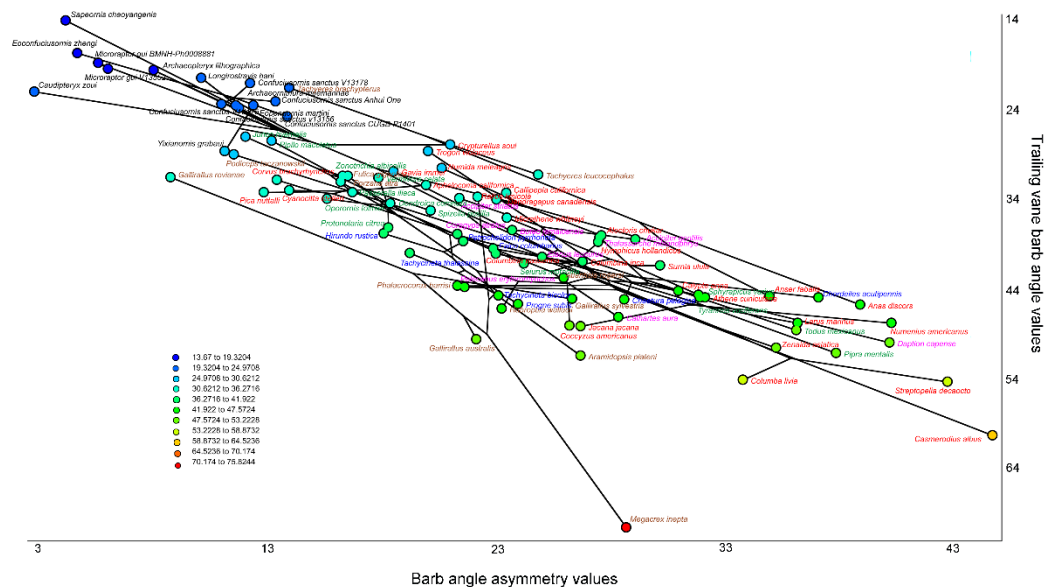

Figure S2. Aves with different flight styles and Mesozoic taxa plotted in a wing phylomorphospace described by trailing vane barb and barb angle asymmetry values. Red, continuous flapping “CF”; blue, flapping and soaring “FS”; purple, flapping and gliding “FG”; green, passerine type flight “PT”; brown, flightless “FL”; black, fossil data.

Interestingly, we found that distinct from other water birds, loons showed very reduced barb angles and angle asymmetry (11.829 and 30.508 for leading and trailing vane barb angles), similar to those of grebes (Figures 1,2, S2).

As barb angles were measured from different feathers and positions, we also mapped the values of barb angle variance across modern flight species. Similar patterns were recovered in ancestral state reconstructions of angle variance values. The leading vane and angle asymmetry values show reduced variance in galloanseres and passerines. Variance for trailing vane barb angles is also small in passerines (Figures S3-S5).

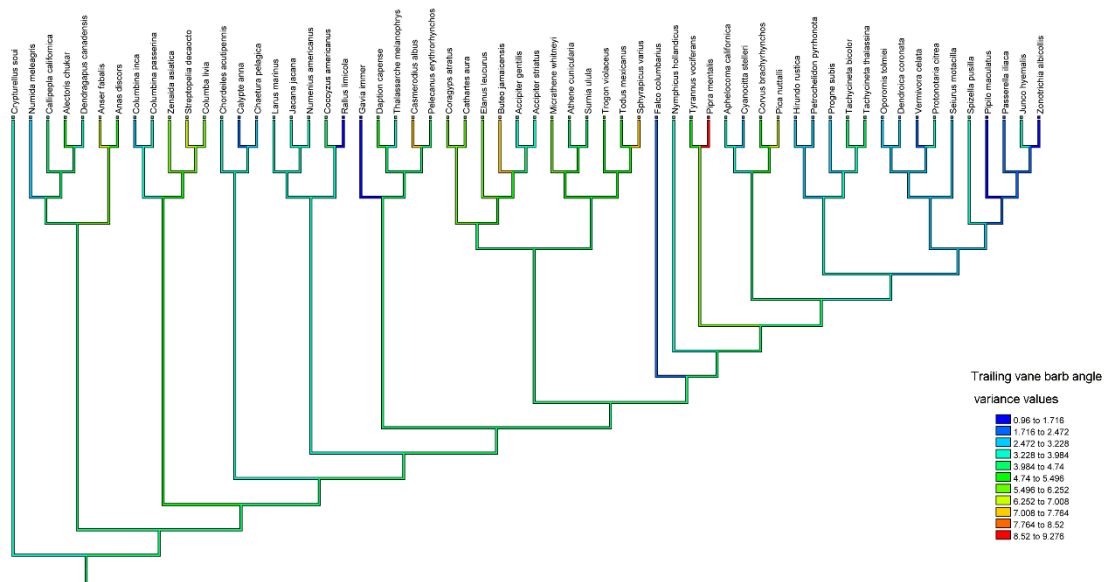

Fig S3. Changes in trailing vane barb angle variance from different feathers (inner, middle and outer) and positions (25% and 50% from feather tip) across extant flight species.

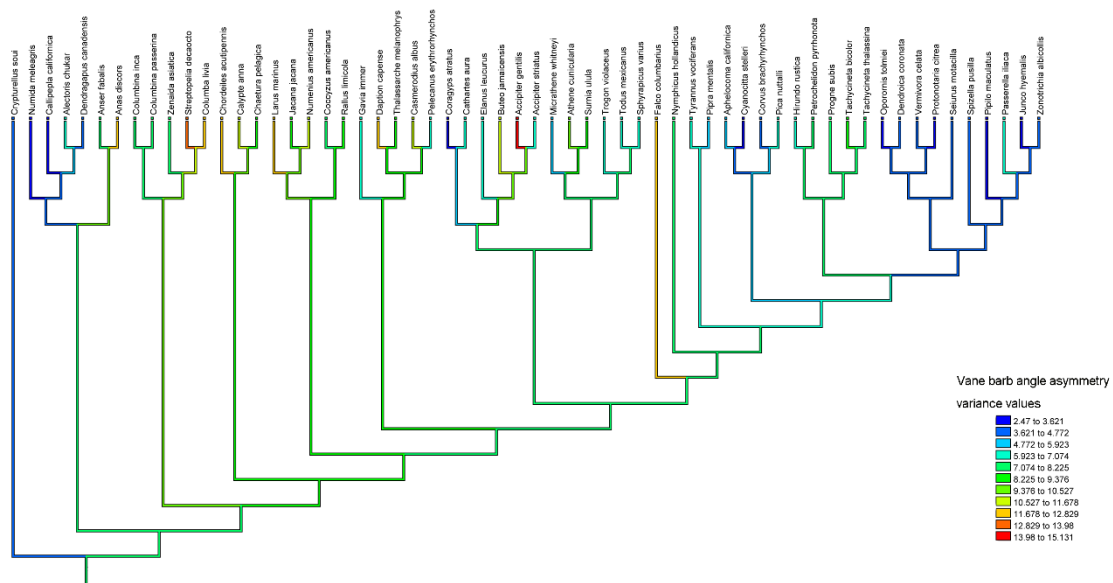

Fig. S4 Changes in vane barb angle asymmetry variance from different (inner, middle and outer) and positions (25% and 50% from feather tip) across extant flight species.

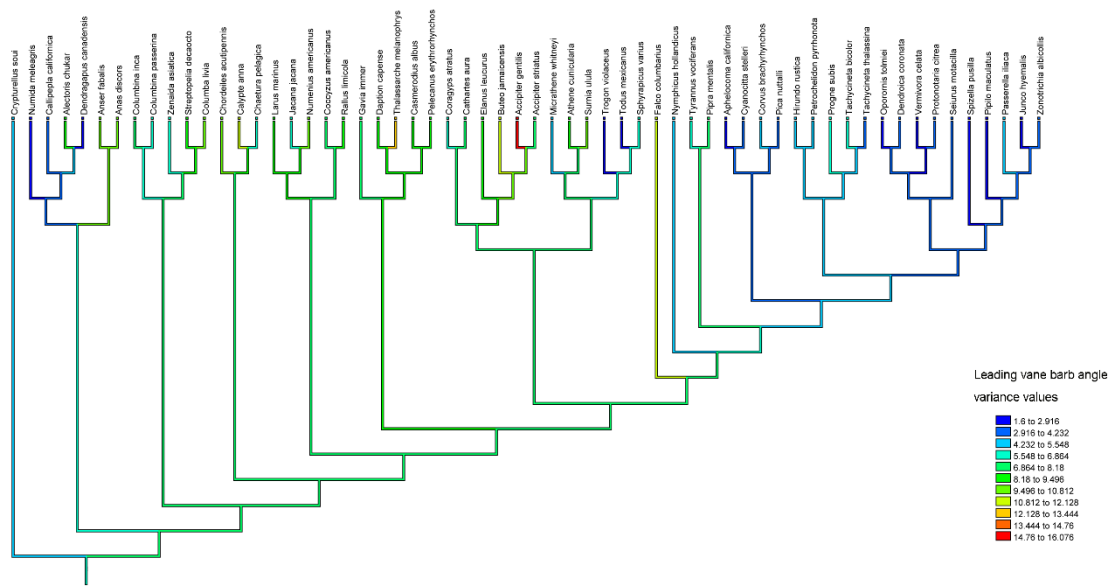

Fig. S5 Changes in Leading vane barb angle variance from different (inner, middle and outer) and positions (25% and 50% from feather tip) across extant flight species.

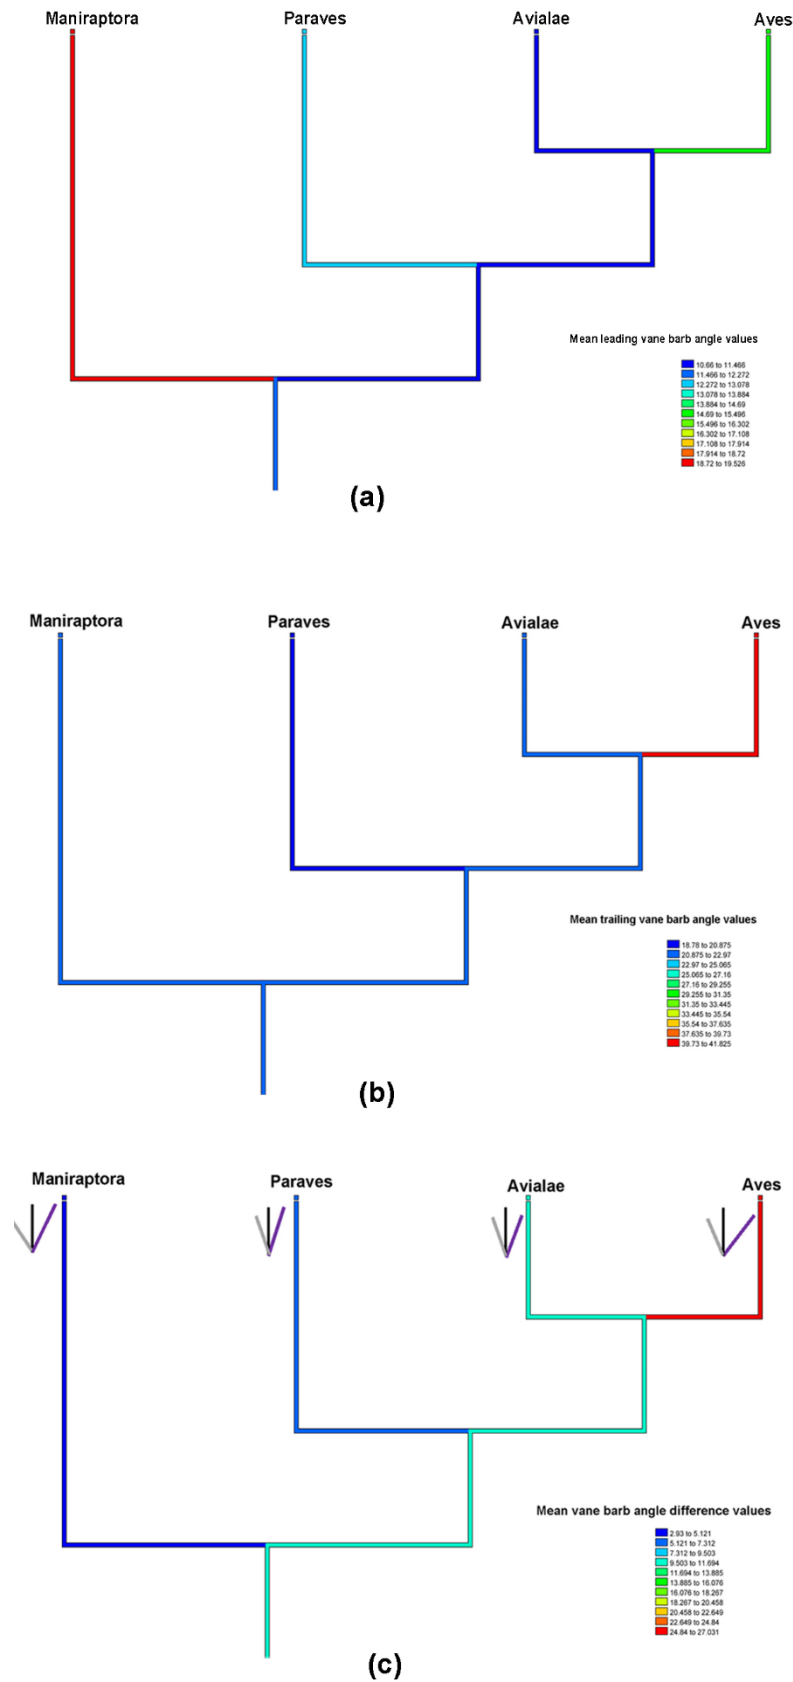

Fig. S6 Ancestral state reconstruction for leading (a), trailing (b) vane barb angles and barb angle asymmetry (c) showing the general evolutionary pattern for simplified phylogeny. Diagrams show the barb geometry. Grey, leading vane barb; purple, trailing vane barb.

Table S1. Measurements used for extant birds from Feo et al. (2015)\*

| Species                         | Ld     | Tr     | Diff   | flight style |
|---------------------------------|--------|--------|--------|--------------|
| <i>Coragyps atratus</i>         | 16.008 | 37.495 | 21.488 | FS           |
| <i>Cathartes aura</i>           | 18.222 | 46.757 | 28.535 | FS           |
| <i>Elanus leucurus</i>          | 14.887 | 40.099 | 25.212 | FS           |
| <i>Buteo jamaicensis</i>        | 13.223 | 37.100 | 23.878 | FS           |
| <i>Accipiter gentilis</i>       | 8.849  | 38.133 | 29.284 | FS           |
| <i>Accipiter striatus</i>       | 11.916 | 33.505 | 21.589 | FS           |
| <i>Anser fabalis</i>            | 9.269  | 44.457 | 35.187 | CF           |
| <i>Anas discors</i>             | 6.226  | 45.384 | 39.158 | CF           |
| <i>Tachyeres brachypterus</i>   | 7.067  | 21.171 | 14.104 | FL           |
| <i>Tachyeres leucocephalus</i>  | 5.885  | 30.917 | 25.031 | FL           |
| <i>Calypte anna</i>             | 12.664 | 43.836 | 31.172 | CF           |
| <i>Chaetura pelagica</i>        | 15.973 | 44.779 | 28.806 | FG           |
| <i>Chordeiles acutipennis</i>   | 7.250  | 44.577 | 37.327 | FG           |
| <i>Jacana jacana</i>            | 20.919 | 47.810 | 26.891 | CF           |
| <i>Numenius americanus</i>      | 6.903  | 47.417 | 40.514 | CF           |
| <i>Larus marinus</i>            | 11.022 | 47.423 | 36.401 | CF           |
| <i>Zenaida asiatica</i>         | 14.690 | 50.156 | 35.466 | CF           |
| <i>Streptopelia decaocto</i>    | 10.968 | 53.943 | 42.975 | CF           |
| <i>Columba livia</i>            | 19.787 | 53.782 | 33.996 | CF           |
| <i>Columbina inca</i>           | 13.582 | 40.570 | 26.989 | CF           |
| <i>Columbina passerina</i>      | 16.558 | 39.732 | 23.175 | CF           |
| <i>Todus mexicanus</i>          | 11.874 | 48.230 | 36.356 | PT           |
| <i>Coccyzus americanus</i>      | 21.291 | 47.710 | 26.419 | CF           |
| <i>Falco columbarius</i>        | 16.050 | 39.114 | 23.064 | FG           |
| <i>Callipepla californica</i>   | 9.340  | 32.963 | 23.623 | CF           |
| <i>Alectoris chukar</i>         | 9.855  | 37.650 | 27.794 | CF           |
| <i>Dendragapus canadensis</i>   | 10.427 | 33.645 | 23.218 | CF           |
| <i>Numida meleagris</i>         | 9.331  | 30.138 | 20.807 | CF           |
| <i>Gavia immer</i>              | 11.829 | 30.508 | 18.679 | CF           |
| <i>Habroptila wallacii</i>      | 22.393 | 45.832 | 23.440 | FL           |
| <i>Atlantisia rogersi</i>       | 16.218 | 42.375 | 26.156 | FL           |
| <i>Fulica gigantea</i>          | 14.321 | 31.000 | 16.679 | FL           |
| <i>Porzana atra</i>             | 15.295 | 31.664 | 16.369 | FL           |
| <i>Aramidopsis plateni</i>      | 24.205 | 51.094 | 26.890 | FL           |
| <i>Megacrex inepta</i>          | 41.273 | 70.174 | 28.901 | FL           |
| <i>Gallirallus australis</i>    | 26.919 | 49.250 | 22.331 | FL           |
| <i>Gallirallus sylvestris</i>   | 18.205 | 44.733 | 26.528 | FL           |
| <i>Gallirallus roviae</i>       | 22.229 | 31.150 | 8.921  | FL           |
| <i>Rallus limicola</i>          | 10.985 | 33.354 | 22.369 | CF           |
| <i>Tyrannus vociferans</i>      | 12.215 | 44.285 | 32.070 | PT           |
| <i>Pipra mentalis</i>           | 12.715 | 50.799 | 38.085 | PT           |
| <i>Aphelocoma californica</i>   | 11.925 | 32.040 | 20.115 | CF           |
| <i>Cyanocitta stelleri</i>      | 18.498 | 32.615 | 14.118 | CF           |
| <i>Corvus brachyrhynchos</i>    | 17.885 | 31.449 | 13.564 | CF           |
| <i>Pica nuttalli</i>            | 19.881 | 32.875 | 12.995 | CF           |
| <i>Hirundo rustica</i>          | 19.154 | 37.410 | 18.256 | FG           |
| <i>Petrochelidon pyrrhonota</i> | 16.564 | 38.299 | 21.736 | FG           |
| <i>Progne subis</i>             | 21.154 | 45.293 | 24.139 | FG           |

|                                  |        |        |        |    |
|----------------------------------|--------|--------|--------|----|
| <i>Tachycineta_bicolor</i>       | 21.071 | 44.374 | 23.303 | FG |
| <i>Tachycineta_thalassina</i>    | 20.222 | 39.624 | 19.402 | FG |
| <i>Oporornis_tolmiei</i>         | 17.854 | 33.617 | 15.762 | PT |
| <i>Protonotaria_citrea</i>       | 18.292 | 36.756 | 18.464 | PT |
| <i>Dendroica_coronata</i>        | 15.581 | 34.123 | 18.542 | PT |
| <i>Seiurus_motacilla</i>         | 16.396 | 40.809 | 24.414 | PT |
| <i>Vermivora_celata</i>          | 13.224 | 31.267 | 18.043 | PT |
| <i>Junco_hyemalis</i>            | 14.478 | 26.672 | 12.194 | PT |
| <i>Zonotrichia_albicollis</i>    | 14.593 | 31.064 | 16.471 | PT |
| <i>Passerella_iliaca</i>         | 16.000 | 32.891 | 16.891 | PT |
| <i>Pipilo_maculatus</i>          | 13.719 | 27.074 | 13.354 | PT |
| <i>Spizella_pusilla</i>          | 14.567 | 34.880 | 20.313 | PT |
| <i>Casmerodius_albus</i>         | 14.982 | 59.920 | 44.937 | CF |
| <i>Pelecanus_erythrorhynchos</i> | 21.610 | 43.411 | 21.801 | FS |
| <i>Phalacrocorax_harrisi</i>     | 21.789 | 43.270 | 21.481 | FL |
| <i>Sphyrapicus_varius</i>        | 12.498 | 44.609 | 32.112 | PT |
| <i>Podiceps_taczanowskii</i>     | 16.903 | 28.605 | 11.702 | FL |
| <i>Daption_capense</i>           | 9.175  | 49.622 | 40.447 | FS |
| <i>Thalassarche_melanophrys</i>  | 10.181 | 37.892 | 27.711 | FS |
| <i>Nymphicus_hollandicus</i>     | 10.707 | 38.358 | 27.652 | CF |
| <i>Micrathene_whitneyi</i>       | 12.011 | 35.665 | 23.655 | CF |
| <i>Athene_cunicularia</i>        | 12.207 | 44.568 | 32.361 | CF |
| <i>Surnia_ulula</i>              | 10.595 | 40.984 | 30.389 | CF |
| <i>Crypturellus_soui</i>         | 6.378  | 27.558 | 21.180 | CF |
| <i>Trogon_violaceus</i>          | 8.041  | 28.254 | 20.213 | CF |

Ld, leading vane angle; Tr, trailing vane angle; Diff, barb angle differences; CF, continours flapping; FS, flapping and soaring; FG, flapping and gliding; PT, passerine type flight; FL, flightless  
\*Specimen numbers and localities can be found from Feo et al. (2015).

Table S2 Measurements used for fossil taxa

| Specimen No.        | Species                            | Ld    | Tr    | Diff  |
|---------------------|------------------------------------|-------|-------|-------|
| STM-7-145           | <i>Archaeornithura meemannae</i>   | 10.62 | 23.16 | 12.54 |
| V13631              | <i>Yixianornis grabau</i>          | 17.00 | 28.29 | 11.29 |
| V11309              | <i>Longirostravis hani</i>         | 9.85  | 20.12 | 10.27 |
| STM-24-1            | <i>Eopengornis martini</i>         | 7.42  | 23.59 | 16.16 |
| V15336              | <i>Eopengornis martini</i>         | 11.13 | 19.46 | 8.33  |
| V13156              | <i>Confuciusornis sanctus</i>      | 11.37 | 23.14 | 11.77 |
| CUGB-P1401          | <i>Confuciusornis sanctus</i>      | 10.36 | 24.38 | 14.03 |
| AGB5488             | <i>Confuciusornis sanctus</i>      | 9.22  | 22.75 | 13.53 |
| V13178              | <i>Confuciusornis sanctus</i>      | 8.27  | 20.69 | 12.41 |
| V13175              | <i>Confuciusornis sanctus</i>      | 11.87 | 23.02 | 11.15 |
| V11977              | <i>Eoconfuciusornis zhengi</i>     | 12.50 | 17.34 | 4.84  |
| DNHM-D3078          | <i>Sapeornis chaoyangensis</i>     | 7.84  | 13.78 | 5.93  |
| Berlin specimen     | <i>Archaeopteryx lithographica</i> | 11.11 | 19.27 | 8.17  |
| BMNH-Ph000881       | <i>Microraptor gui</i>             | 12.74 | 18.48 | 5.74  |
| V13352              | <i>Microraptor gui</i>             | 12.90 | 19.08 | 6.18  |
| NGMC 97-4-A DSC2551 | <i>Caudipteryx zoui</i>            | 18.72 | 21.66 | 2.93  |

Ld, leading vane angle; Tr, trailing vane angle; Diff, barb angle differences; STM, Shandong Tianyu Natural History Museum; V, Institute of Vertebrate Paleontology and Paleoanthropology; CUGB, China University of Geosciences (Beijing); DNHM, Dalian Natural History Museum; BMNH, Beijing Museum of Natural History; NGMC, National Geological Museum of China.



Table S3 Fossil age (Ma) data for paleotree [31].

| Species                            | Min_age         | Max_age         | Start  | End    | Midpoint |
|------------------------------------|-----------------|-----------------|--------|--------|----------|
| <i>Yixianornis_grabau</i>          | Aptian          | Aptian          | 126.3  | 113    | 119.65   |
| <i>Longirostravis_hani</i>         | Late_Barremian  | Early_Aptian    | 128.55 | 119.65 | 124.1    |
| <i>Eopengornis_martini</i>         | Hauterivian     | Hauterivian     | 133.9  | 130.8  | 132.35   |
| <i>Confuciusornis_sanctus</i>      | Late_Barremian  | Early_Aptian    | 128.55 | 119.65 | 124.1    |
| <i>Eoconfuciusornis_zhengi</i>     | Hauterivian     | Hauterivian     | 133.9  | 130.8  | 132.35   |
| <i>Sapeornis_chaoyangensis</i>     | Aptian          | Aptian          | 126.3  | 113    | 119.65   |
| <i>Archaeopteryx_lithographica</i> | Early_Tithonian | Early_Tithonian | 152.1  | 147.7  | 149.9    |
| <i>Microraptor_gui</i>             | Aptian          | Aptian          | 126.3  | 113    | 119.65   |
| <i>Caudipteryx_zoui</i>            | Aptian          | Aptian          | 126.3  | 113    | 119.65   |
| <i>Archaeornithura_meemannae</i>   | Hauterivian     | Hauterivian     | 133.9  | 130.8  | 132.35   |

10. Images showing the angle measurements of Mesozoic fossil taxa.

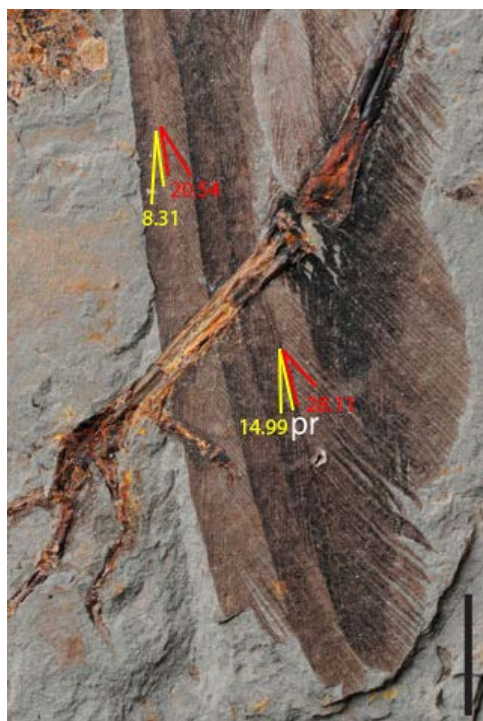

*Archaeornithura meemannae* (STM7-145)

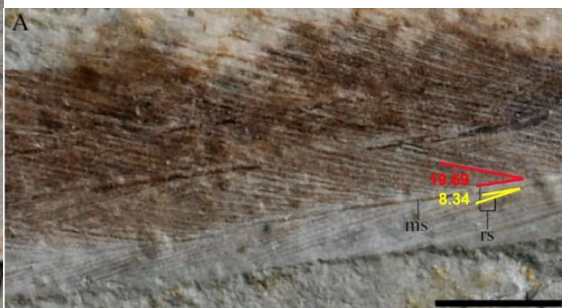

*Eopengornis martini* (V15336)

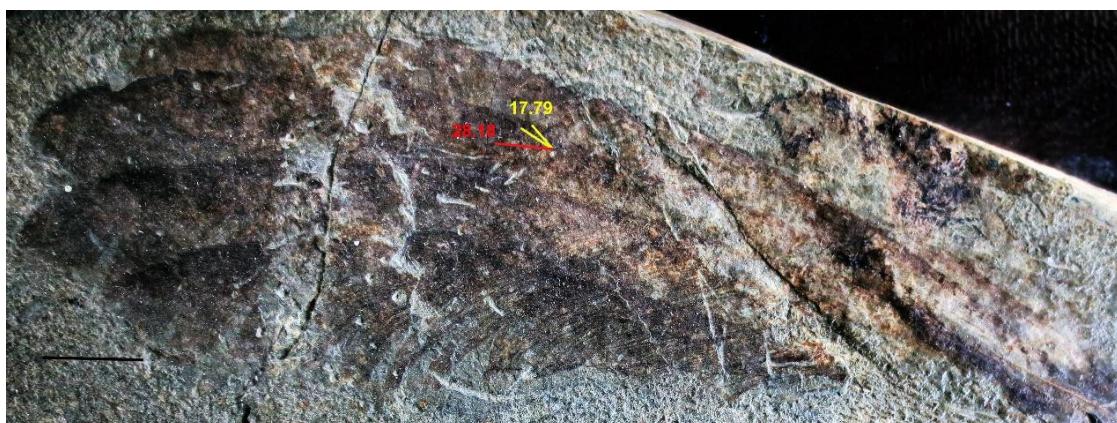

*Yixianornis grabau* (V13631)

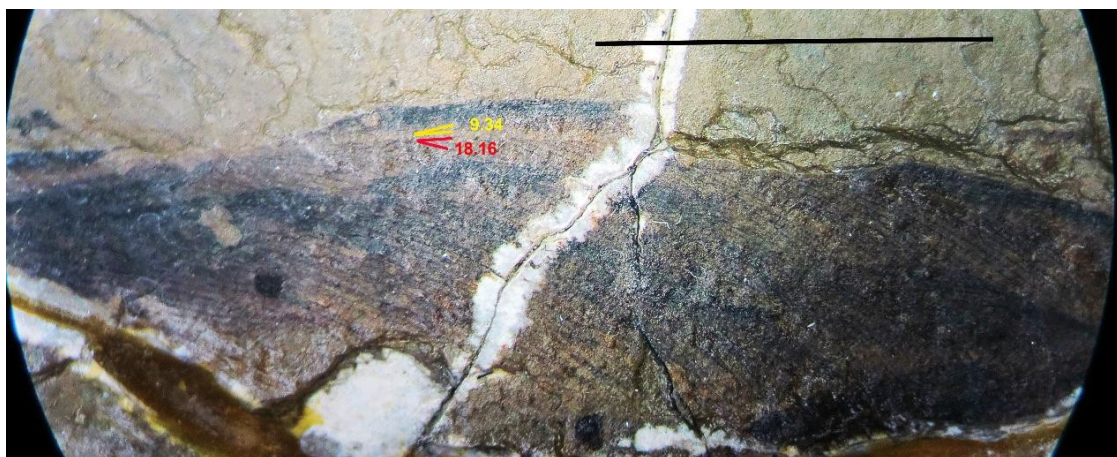

*Longirostravis hani* (V11309)



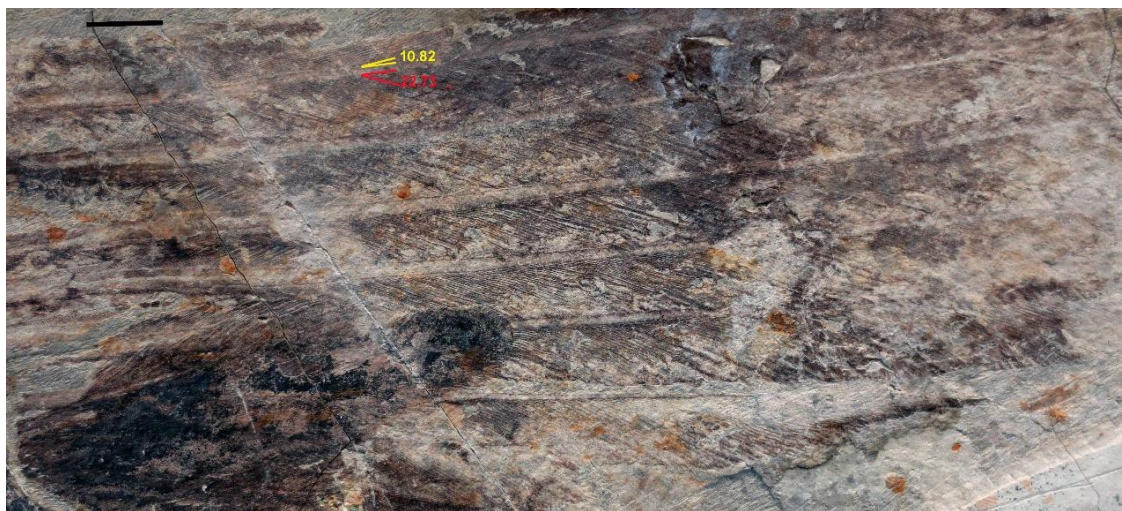

*Confuciusornis sanctus*(V13156)

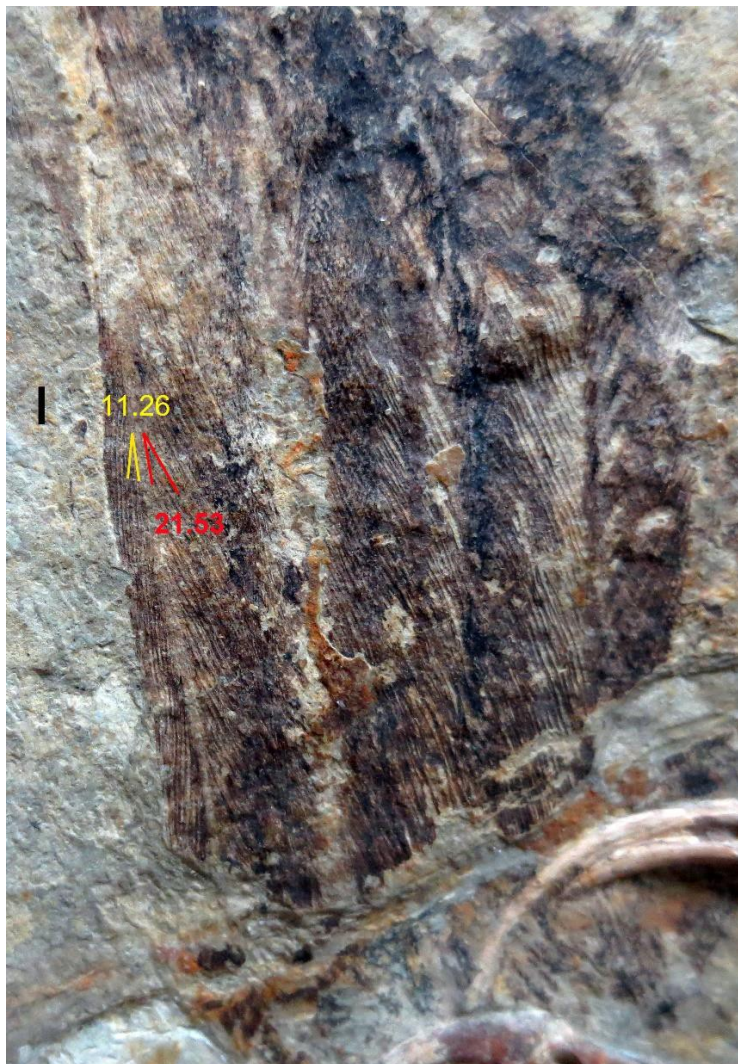

*Confuciusornis sanctus* (V13175)



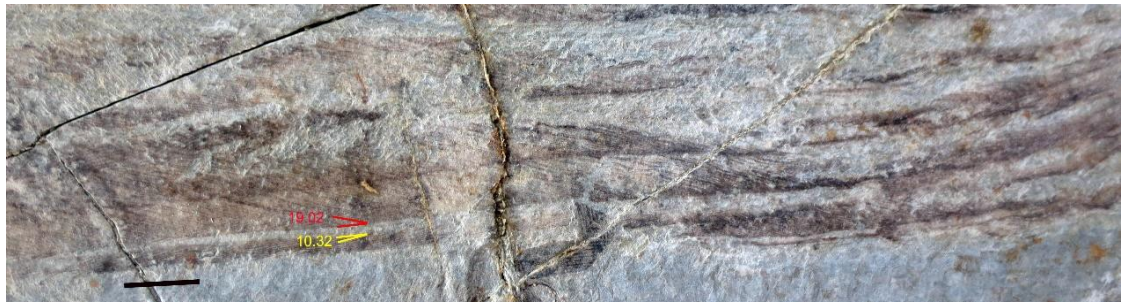

*Confuciusornis sanctus* (V13178a)

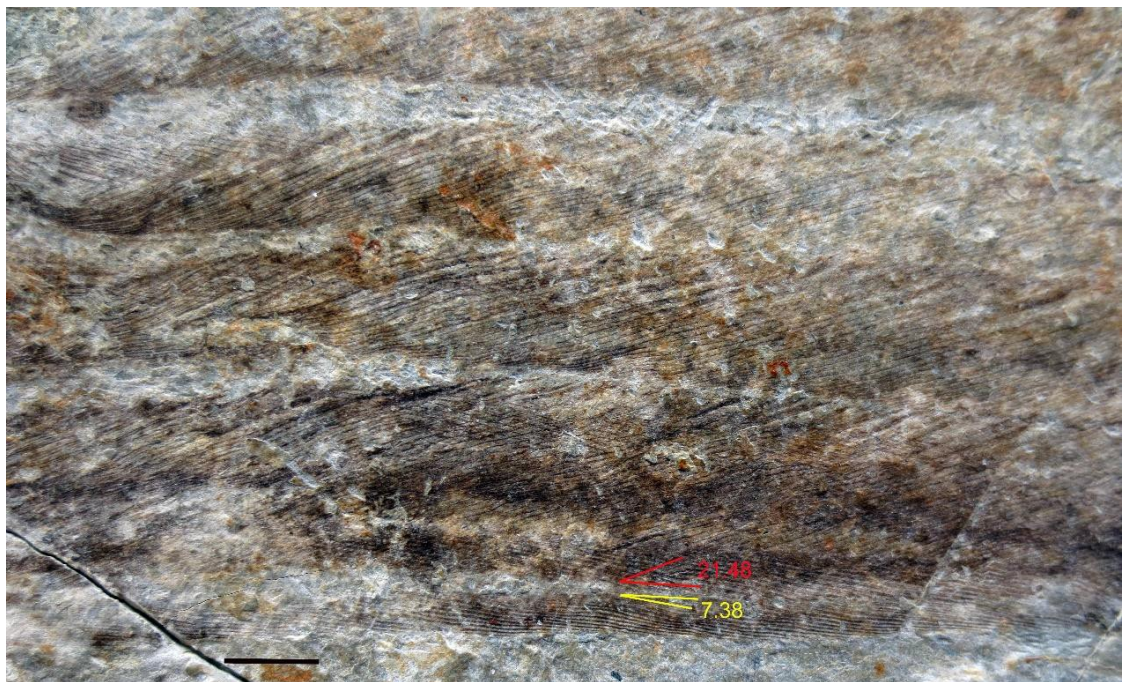

*Confuciusornis sanctus* (V13178b)

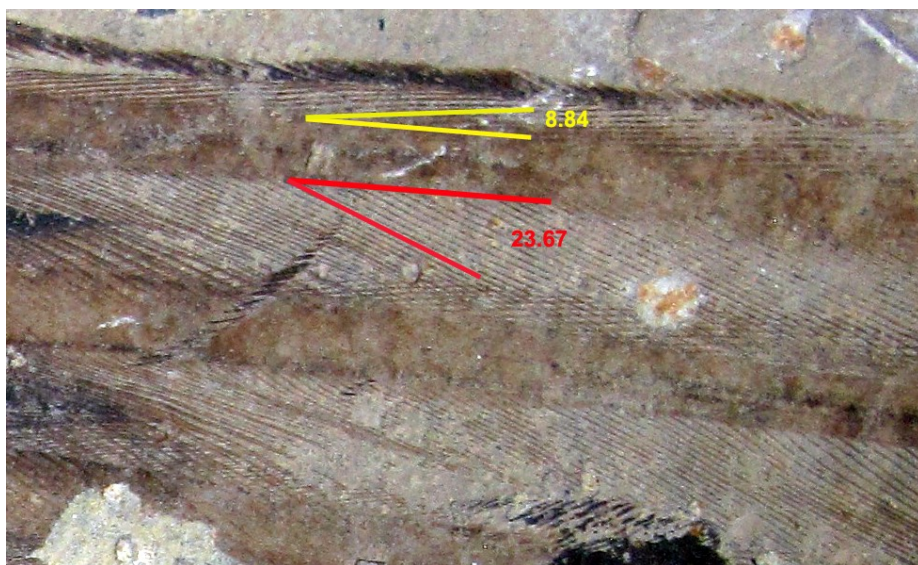

*Confuciusornis sanctus* (AGB5488)



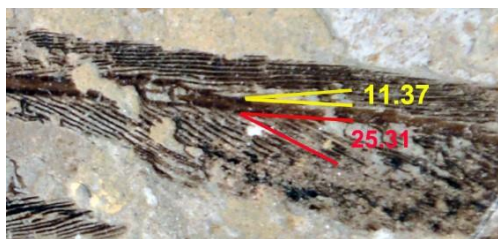

*Confuciusornis sanctus* (CUGB-P1401)

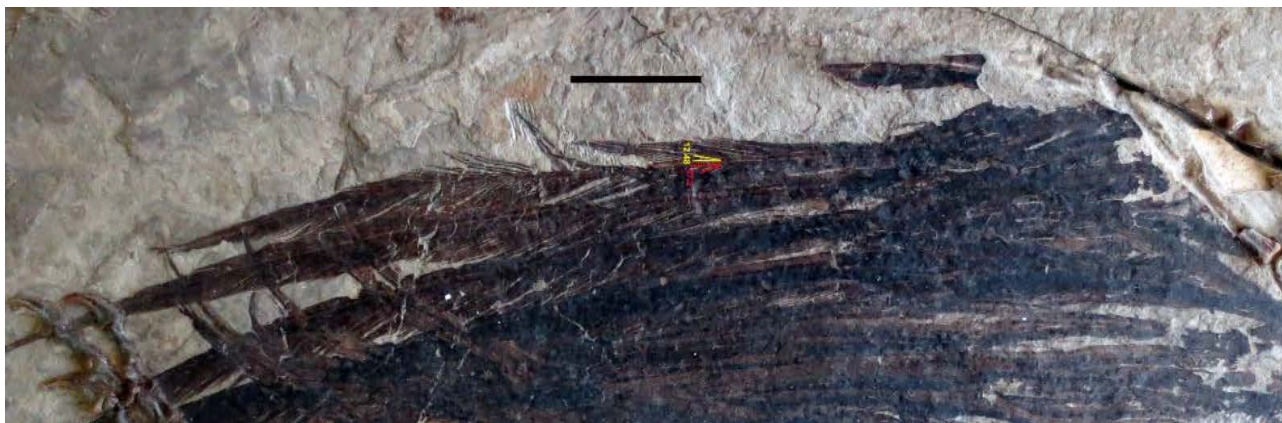

*Eoconfuciusornis zhengi* (V11977)

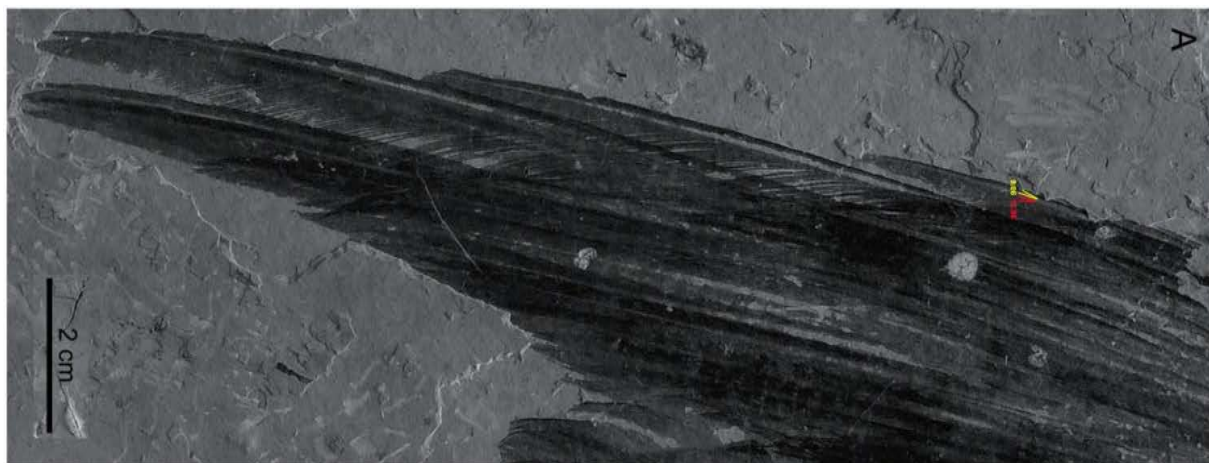

*Sapeornis chaoyangensis* (DNHM-D3078)

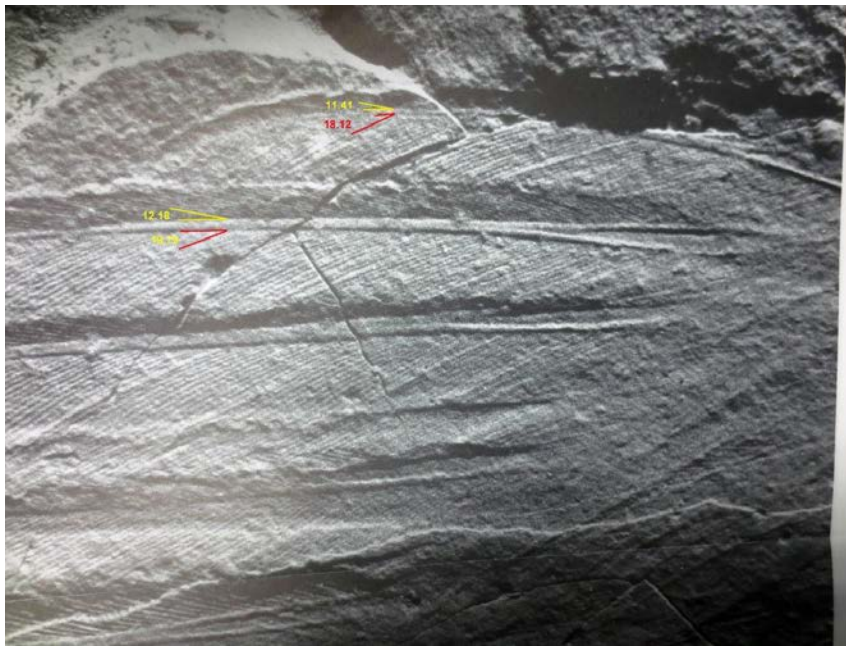

***Archaeopteryx lithographica* (Berlin specimen)**

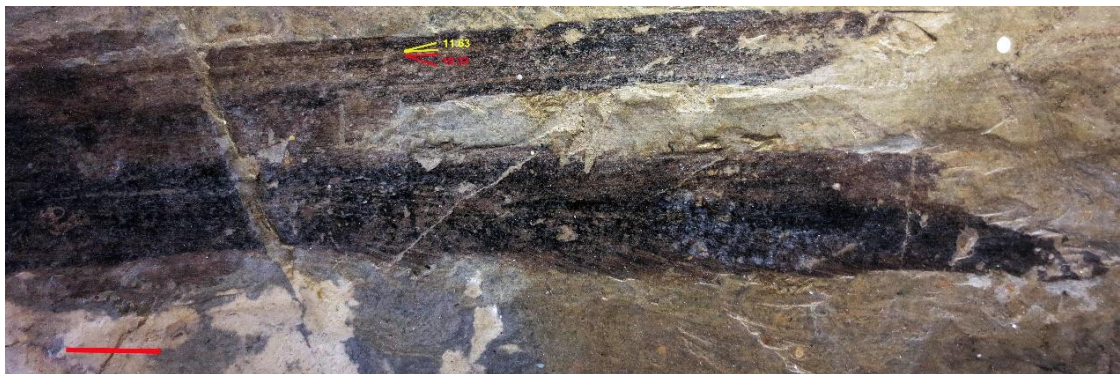

***Microraptor gui* (V13352)**

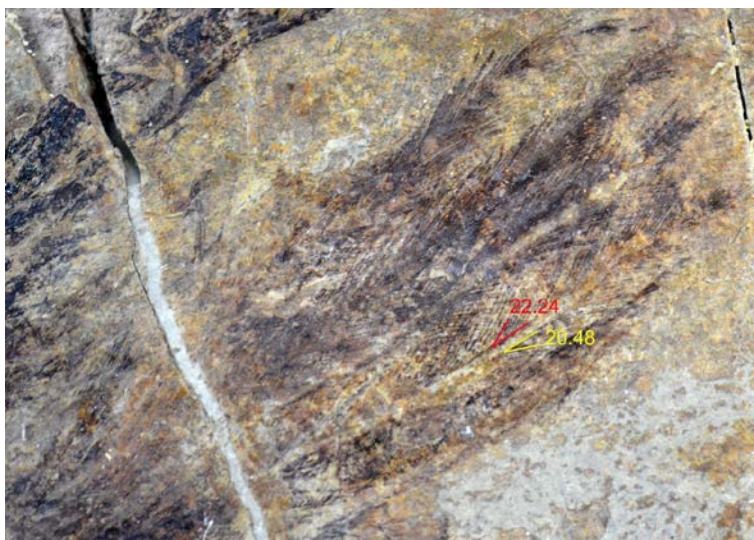

***Caudipteryx zoui* (NGMC 97-4-A DSC2551)**



1. Pagel M. 1999 Inferring the historical patterns of biological evolution. *Nature* **401**, 877-884.
2. Blomberg SP, Garland Tives AR. 2003 Testing for phylogenetic signal in comparative data: behavioral traits are more labile. *Evolution* **57**, 717-745.
3. Team R. 2013 R Development Core Team.
4. Revell LJ. 2012 phytools: an R package for phylogenetic comparative biology (and other things). *Methods Ecol. Evol.* **3**, 217-223.
5. Maddison W, Maddison D. 2011 Mesquite 2.75: a modular system for evolutionary analysis. <https://www.mesquiteproject.org>
6. Maddison DR. 1991 The discovery and importance of multiple islands of most-parsimonious trees. *Systematic Biol.* **40**, 315-328.
7. Jetz W, Thomas G, Joy J, Hartmann K, Mooers A. 2012 The global diversity of birds in space and time. *Nature* **491**, 444-448.
8. Hackett SJ, Kimball RT, Reddy S, Bowie RC, Braun EL, Braun MJ, Chojnowski JL, Cox WA, Han K-L, Harshman J. 2008 A phylogenomic study of birds reveals their evolutionary history. *Science* **320**, 1763-1768.
9. Barker FK, Burns KJ, Klicka J, Lanyon SM, Lovette IJ. 2015 New insights into New World biogeography: An integrated view from the phylogeny of blackbirds, cardinals, sparrows, tanagers, warblers, and allies. *Auk* **132**, 333-348.
10. Garciar JC, Gibb GC, Trewick SA. 2014 Deep global evolutionary radiation in birds: diversification and trait evolution in the cosmopolitan bird family Rallidae. *Mol. Phylogenet. Evol.* **81**, 96-108.
11. Bapst DW. 2012 paleotree: an R package for paleontological and phylogenetic analyses of evolution. *Methods Ecol. Evol.* **3**, 803-807.
12. Clarke J. 2013 Feathers Before Flight. *Science* **340**, 690-692. (doi:10.1126/science.1235463).
13. Eliason CM, Clarke JA. 2018 Metabolic physiology explains macroevolutionary trends in the melanic colour system across amniotes. *Proc. R. Soc. B.* **285**, 20182014.
14. Adams DC, Collyer M, Kaliontzopoulou AS, Sherratt E. 2016 Geomorph: Software for geometric morphometric analyses.
15. Collyer M, Adams DC. 2018 RRPP: An r package for fitting linear models to high-dimensional data using residual randomization. *Methods Ecol. Evol.* **9**, 1772-1779.
16. Orme D, Freckleton R, Thomas G, Petzoldt T, Fritz S, Isaac N, Pearse W. 2012 Caper: comparative analyses of phylogenetics and evolution in R. R package version 0.5.
17. Bruderer B, Peter D, Boldt A, Liechti F. 2010 Wing-beat characteristics of birds recorded with tracking radar and cine camera. *Ibis* **152**, 272-291.
